# Supplementary material for: B-Site modification of LaMn0.9Co0.1O3 perovskite using a selective dissolution method in C3H6 oxidation
Source: Royal Society of Chemistry journal article supplement (doi:10.1039/d0cy01381a), 2020-01-01
Supplement: d0cy01381a1.pdf [file d0cy01381a1.pdf]

## Supplementary Information

### B-sites Modification of $\text{LaMn}_{0.9}\text{Co}_{0.1}\text{O}_3$ Perovskite Using Selective Dissolution Method in $\text{C}_3\text{H}_6$ Oxidation

Zhan Liu<sup>a</sup>, Zhengguo Li<sup>b</sup>, Xuefeng Chu<sup>a</sup>, Yuankai Shao<sup>b</sup>, Kaixiang Li<sup>b</sup>, Xiaoping Chen<sup>a</sup>,  
Haiyan Liu<sup>a</sup>, Jianjun Chen<sup>\*a</sup> and Junhua Li

<sup>a</sup>National Engineering Laboratory for Multi Flue Gas Pollution Control Technology  
and Equipment, School of Environment, Tsinghua University, Beijing, 100084, P. R.  
China

<sup>b</sup>National Engineering Laboratory for Mobile Source Emission Control Technology,  
China Automotive Technology & Research Center Co.,Ltd, Tianjin 300300, China

\* Corresponding author: Jianjun Chen

E-mail: chenjianjun@tsinghua.edu.cn

## 1. Experimental

The sol-gel method was used to prepare LaMnO<sub>3</sub> perovskite for comparison. La(NO<sub>3</sub>)<sub>3</sub>·6H<sub>2</sub>O, Mn(NO<sub>3</sub>)<sub>3</sub>·4H<sub>2</sub>O, Co(NO<sub>3</sub>)<sub>2</sub>·6H<sub>2</sub>O and anhydrous citric acid were weighted at mass ratio of 1.0:0.9:0.1 and dissolved in deionized water. Then the solution was kept at 90 °C for 2 h with stirring until the formation of gel, afterwards the formed gel was dried and foamed at 110 °C overnight. Subsequently, the obtained sample was ground and transferred into a crucible and placed in a muffle furnace at 1 °C/min from room temperature to 200 °C for 1 h. Then, the temperature was continuously increased to 750 °C for 2 h at a heating rate of 5 °C/min. At last, a black powdery LaMnCoO<sub>3</sub> perovskite material was obtained. After that, the sample was immersed in 10% HNO<sub>3</sub> for 12 h for etching. After acid treatment, the pH value was neutralized by centrifugation and dried. The samples were named LaMnCoO<sub>3</sub> and LaMnCoO<sub>3</sub>-H, respectively.

## 2. Catalytic activity test and characterization

In the C<sub>3</sub>H<sub>6</sub> oxidation experiment, 50 mg catalyst (40-60 mesh) was used. The typical reaction feed gas contained 1000 ppm C<sub>3</sub>H<sub>6</sub>, 10% O<sub>2</sub> and N<sub>2</sub> as the balance gas (200 mL min<sup>-1</sup>). The gas hourly space velocity (GHSV) was approximately 240,000 cm<sup>3</sup> g<sup>-1</sup> h<sup>-1</sup>. The reaction temperature was increased from 20 °C to 270 °C. The concentrations of CO and CO<sub>2</sub> in the inlet and outlet streams was continually monitored by a FTIR spectrometer (MKS6030HS).

Where [C<sub>3</sub>H<sub>6</sub>]<sub>in</sub> and [C<sub>3</sub>H<sub>6</sub>]<sub>out</sub> were the concentration of Propylene in and out gas, respectively.

$$X_{C_3H_6}(\%) = 100 \times \frac{[C_3H_6]_{in} - [C_3H_6]_{out}}{[C_3H_6]_{in}} \quad \text{Equation S1}$$

S1

In order to determine the activation energy of the catalyst, this study controlled the conversion rate of C<sub>3</sub>H<sub>6</sub> to be less than 20% by reducing the amount of catalyst during the measurement. The reaction rate constant was calculated by Equation S1:

$$k = -\frac{F}{m} \times \ln(1 - x) \quad \text{Equation S2}$$

In the formula,  $k$  represents the reaction rate constant ( $\mu\text{mol g}^{-1}\text{s}^{-1}$ ),  $F$  represents the gas flow rate ( $\mu\text{mol/s}$ ),  $m$  represents the amount of catalyst used in the test ( $\text{g}$ ), and  $x$  represents the conversion rate of  $\text{C}_3\text{H}_6$ . Calculate the reaction rate constant  $k$  according to the above formula, and then use the Arrhenius formula (see Equation S1-2) to perform scatter fitting to obtain the Arrhenius line graph,

$$\ln k = -\frac{E_a}{RT} + \ln A \quad \text{Equation S3}$$

With  $1000/T$  as the horizontal coordinate and  $\ln k$  as the vertical coordinate, the slope is expressed as the  $E_a$  of apparent activation energy.

XRD was performed on a powder X-ray diffractometer (Rigaku, SmartLab 9 kW, Japan) with Cu K $\alpha$  radiation. The scanning angles are fixed at 10 to 80 ° and the scan speed is 8 °/min.

Analyses of the element content were performed by inductively coupled plasma spectroscopy (ICP) on a Thermo Fisher Scientific iCAP-7000 spectrometer.

The  $\text{N}_2$  adsorption-desorption isotherms were measured at a liquid nitrogen temperature by a micromeritics ASAP 2460 instrument in the static mode. Before the measurement, the catalysts were degassed at 350 °C for 4 h. The specific surface area was calculated by the Brunauer-Emmett-Teller (BET) equation. The pore volumes and average pore diameters were determined using the Barrett-Joyner-Halenda (BJH) method from the desorption branch of the  $\text{N}_2$  adsorption isotherm.

Morphology of the as-prepared samples was observed by scanning electron microscopy (SEM) using a JSM7900F microscope at an accelerating voltage of 5 kV.

X-ray photoelectron spectroscopy (XPS) measurements were carried out on a Thermo Fisher Scientific EscaLab 250Xi instrument. Catalyst charging during the measurements was compensated by an electron flood gun.

$\text{H}_2$ -TPR and  $\text{O}_2$ -TPD experiments were performed on a chemisorption analyzer (Micromeritics, AutoChem 2920 ThermoStar). During  $\text{H}_2$ -TPR, the catalyst in the quartz

reactor was pretreated at 350 °C in He for 1 h and cooled to 50 °C. Then, the temperature was increased to 900 °C with a feeding mixture of 10% H<sub>2</sub>/He (50 mL min<sup>-1</sup>) at a rate of 10 °C/min. The consumption of H<sub>2</sub> was continuously recorded. For the O<sub>2</sub>-TPD analysis, 20 mg of freshly prepared sample was loaded into a quartz U-shaped reactor. The sample was initially treated with He at a flow rate of 30 mL/min to 150 °C (10 °C/min) for 30 min to remove moisture. And then cooled to 50 °C and pure O<sub>2</sub> was introduced to the sample, following by 30 mL/min He flushing. After 30 min equilibrium, the temperature ramped at ramp rate of 10 °C/min from room temperature to 900 °C. The variation in O<sub>2</sub> concentration from the cell effluent was monitored on-line by the TCD detector.

C<sub>3</sub>H<sub>6</sub>-TPD experiment was performed using a FTIR spectrometer (MKS, MultiGas 6030HS). First, the sample were pretreated at 300 °C in a N<sub>2</sub> flow (50 ml/min) for 1 h. Then, C<sub>3</sub>H<sub>6</sub> (50 ml/min) was absorbed to sample for 1 h after cooling down to room temperature, followed by N<sub>2</sub> purging for 30 min. Finally, the temperature was increased to 800 °C (10 °C /min) under a N<sub>2</sub> flow.

### 3. Results and discussion

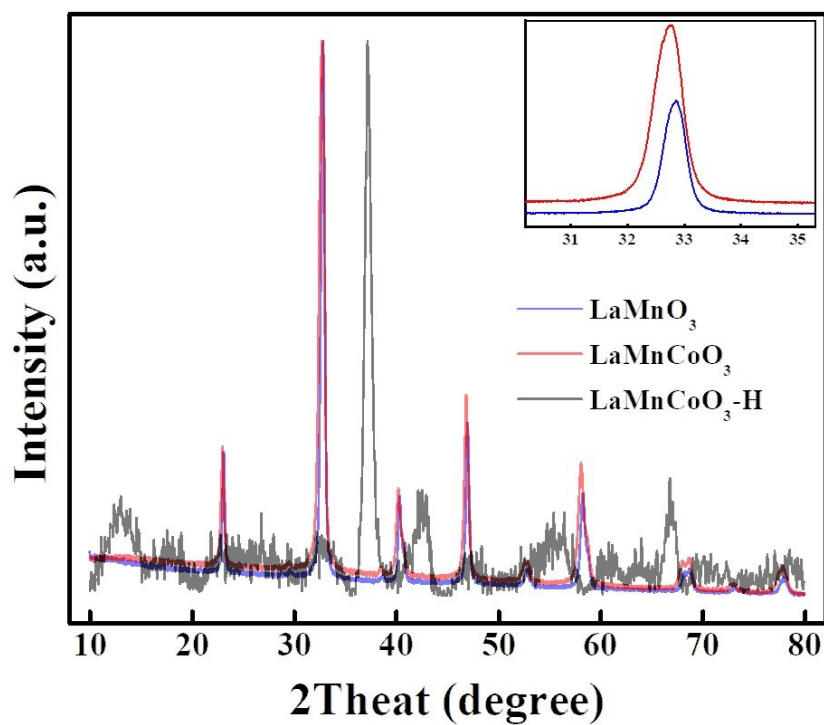

Fig. S1 X-ray diffraction pattern of  $\text{LaMnO}_3$ ,  $\text{LaMnCoO}_3$ , and  $\text{LaMnCoO}_3\text{-H}$  catalysts.

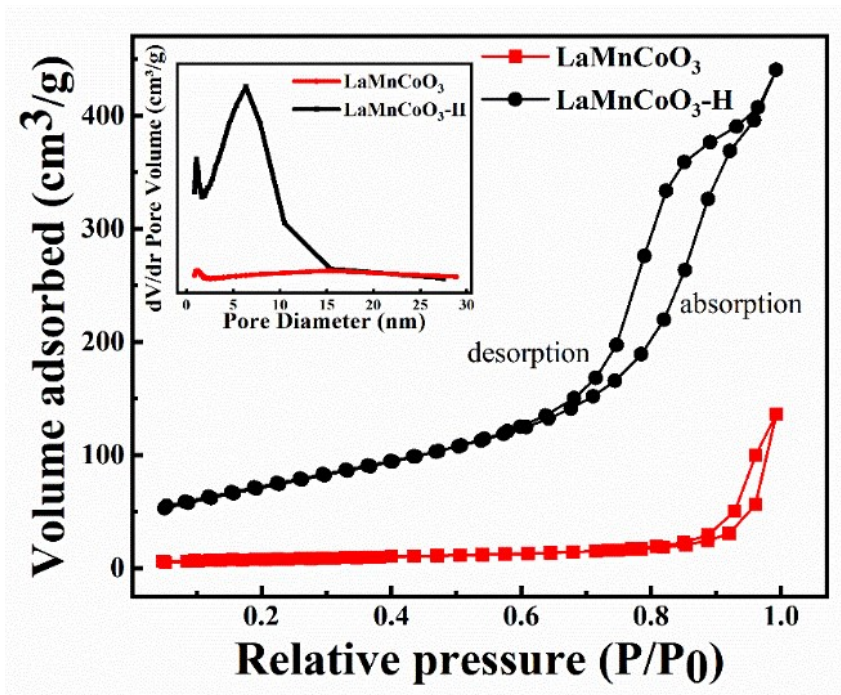

Fig. S2  $N_2$  adsorption-desorption isotherm and pore size distribution of  $LaMnCoO_3$  and  $LaMnCoO_3-H$  catalysts.

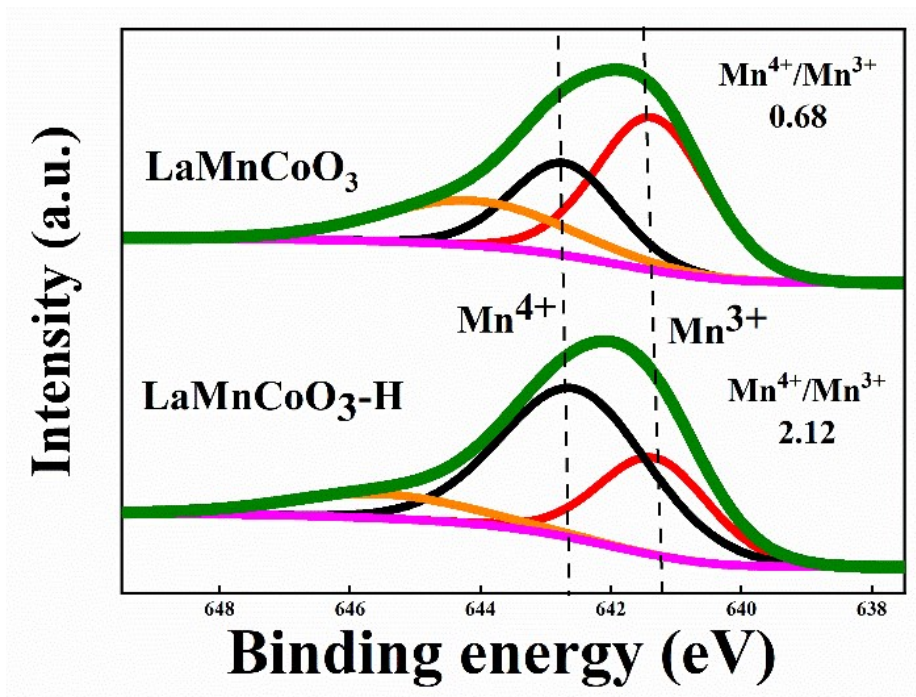

Fig. S3 Mn 2p XPS spectrum of  $\text{LaMnCoO}_3$  and  $\text{LaMnCoO}_3\text{-H}$  catalysts.
